# Supplementary material for: Quantizing single-molecule surface-enhanced Raman scattering with DNA origami metamolecules
Source: PubMed Central journal article supplement — Sci Adv. 2019 Sep 27;5(9):eaau4506. doi: 10.1126/sciadv.aau4506 (PMC6764828; doi:10.1126/sciadv.aau4506), 2019-09-27
Supplement: aau4506_SM.pdf [file aau4506_SM.pdf]

Supplementary Materials for  
**Quantizing single-molecule surface-enhanced Raman scattering  
with DNA origami metamolecules**

Weina Fang, Sisi Jia, Jie Chao, Liqian Wang, Xiaoyang Duan, Huajie Liu\*, Qian Li, Xiaolei Zuo,  
Lihua Wang, Lianhui Wang\*, Na Liu, Chunhai Fan\*

\*Corresponding author. Email: liuhuajie@tongji.edu.cn (H.L.); iamlhwang@njupt.edu.cn (L.W.);  
fanchunhai@sjtu.edu.cn (C.F.)

Published 27 September 2019, *Sci. Adv.* **5**, eaau4506 (2019)  
DOI: 10.1126/sciadv.aau4506

**This PDF file includes:**

Fig. S1. Schematic drawings of DNA origami template.

Fig. S2. Super-origami templates.

Fig. S3. Characterization of 80-80 nm AuNP metamolecules.

Fig. S4. SEM images of 50-80 nm and 80-80-80-80 nm AuNP metamolecules.

Fig. S5. Schematic representation of SEM-DFM-Raman correlative imaging for plasmonic property investigations.

Fig. S6. Characterization of the plasmonic properties of 80-nm homodimer [tuple (y, y)] using the “DFM-SEM correlative imaging.”

Fig. S7. Characterization of the plasmonic properties of three metamolecules using the “DFM-SEM correlative imaging.”

Fig. S8. The absolute scattering spectra of two homotetramers and two homotrimers.

Fig. S9. FDTD calculations of the electromagnetic field (E) at mid-height of the tetrameric metamolecules.

Fig. S10. SERS spectra taken from individual tetrameric metamolecules with different numbers of ROX.

Supplementary Appendix

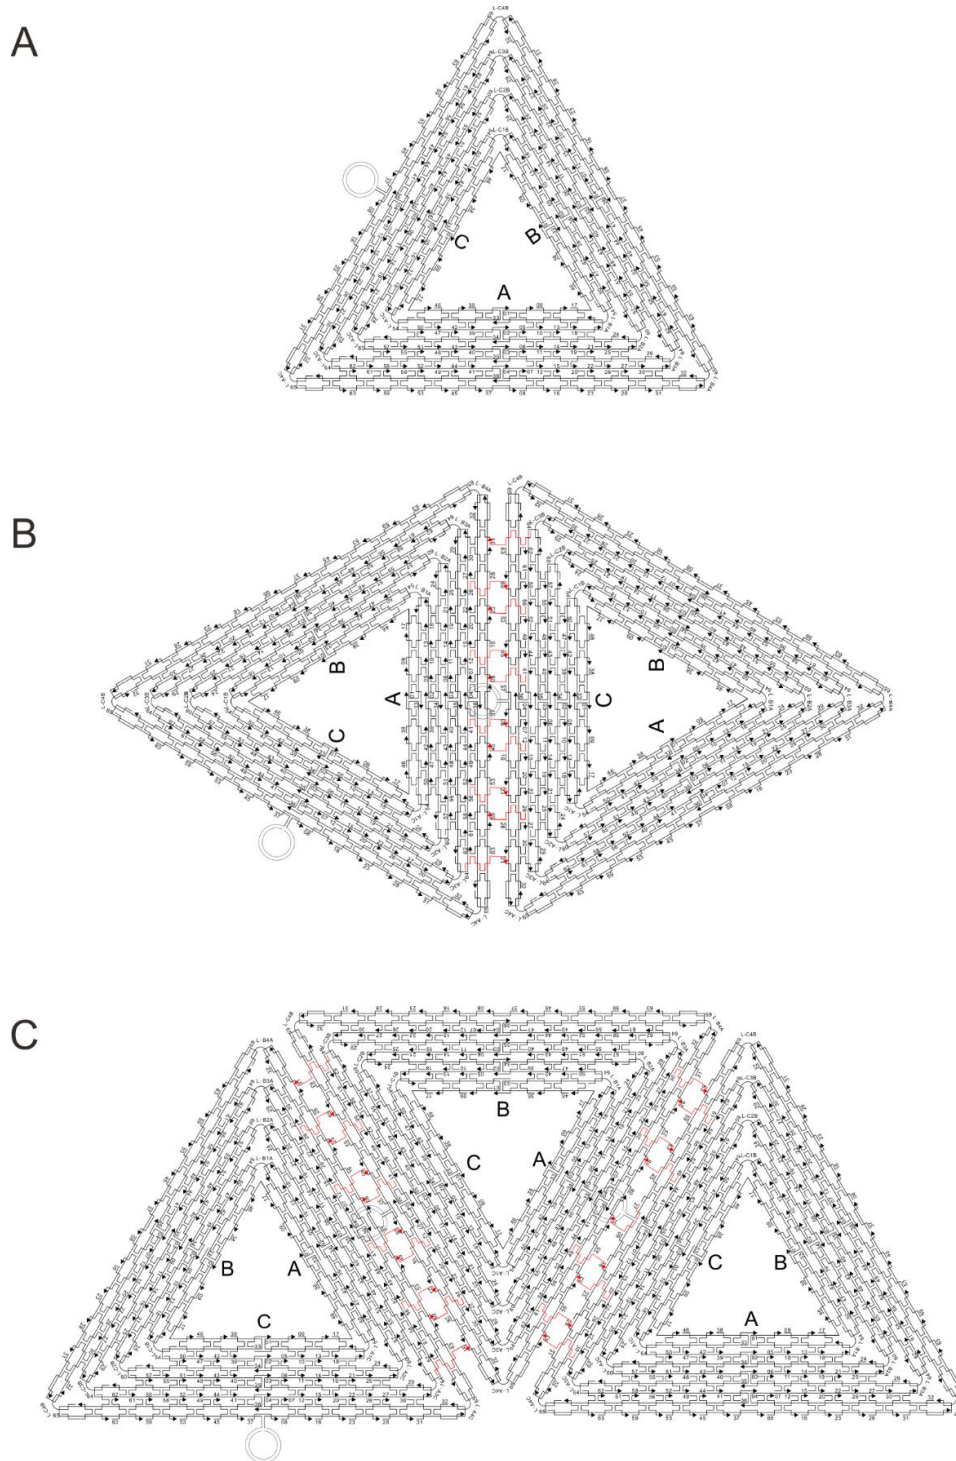

**Fig. S1. Schematic drawings of DNA origami template.** (A) Single triangular origami. (B) The rhombus-shaped super-origami. (C) The trapezoid-shaped super-origami.

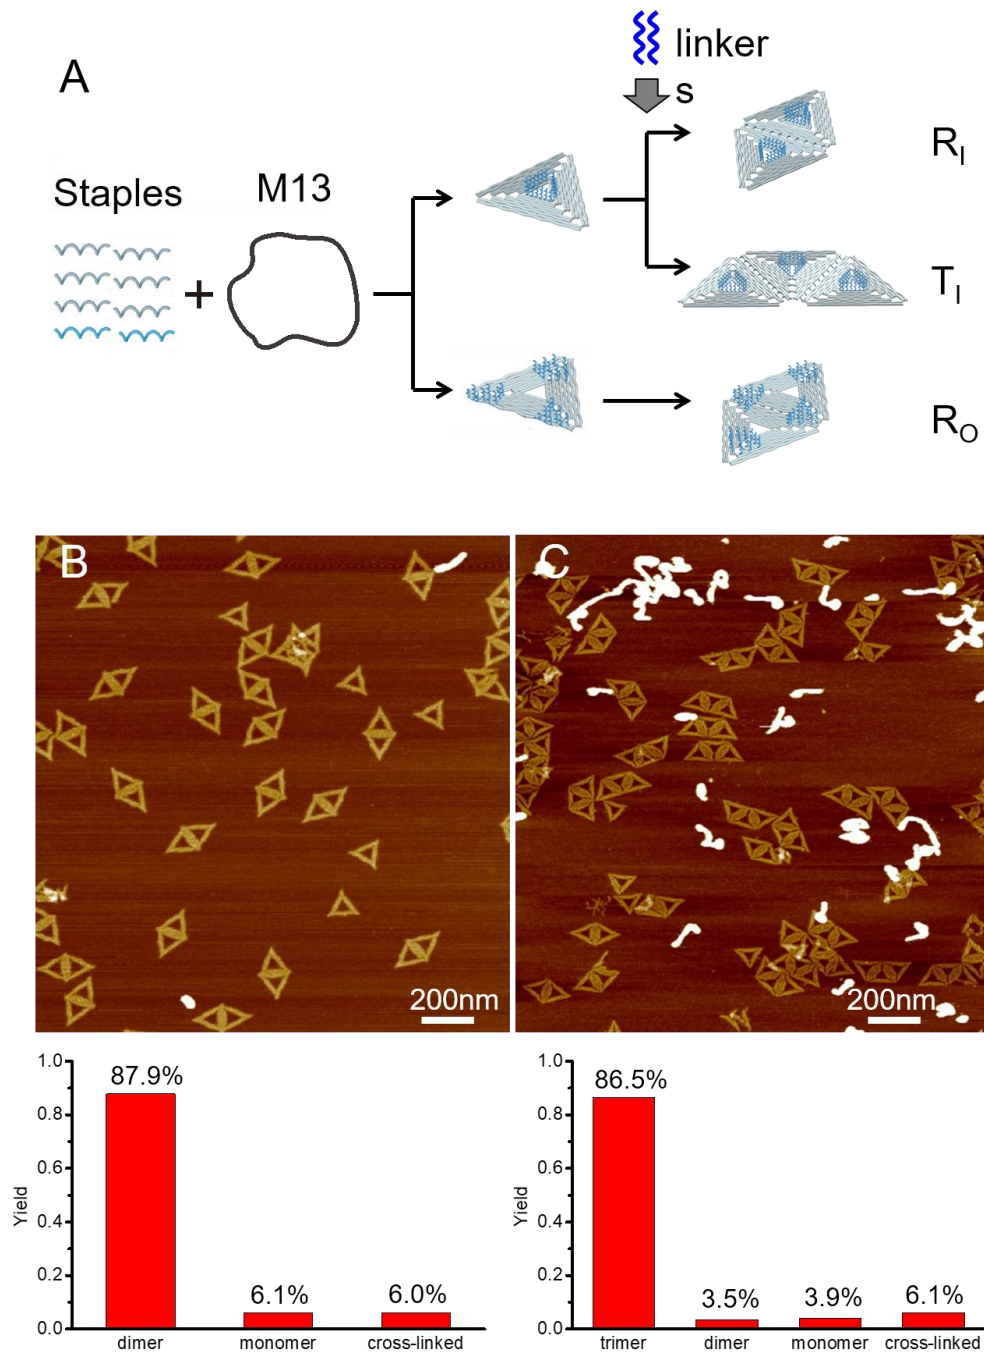

**Fig. S2. Super-origami templates.** (A) Schematic illustration of the building procedure. Super-origami templates were assembled from two triangular origami units with site-specific anchors. (B) AFM image and the counted yield of the rhombus-shaped super-origami (N=132). (C) AFM image and the counted yield of the trapezoid-shaped super-origami (N=229).

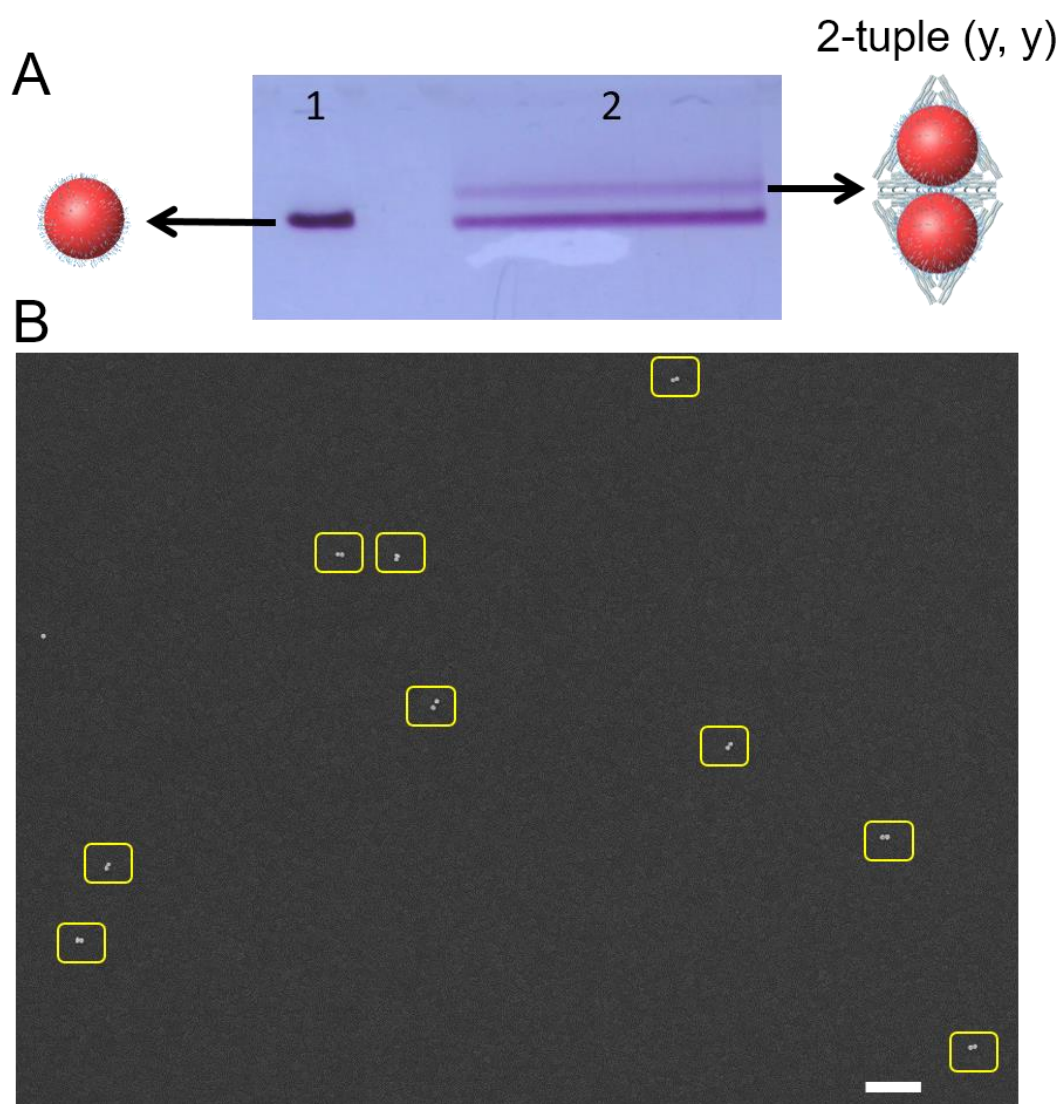

**Fig. S3. Characterization of 80-80 nm AuNP metamolecules.** (A) Correctly formed homo-dimer metamolecules were separated from free AuNPs and aggregates by gel electrophoresis running on a 0.5% agarose gel. (B) SEM image of the 2-tuple (y, y) metamolecules. Scale bar, 1  $\mu\text{m}$ .

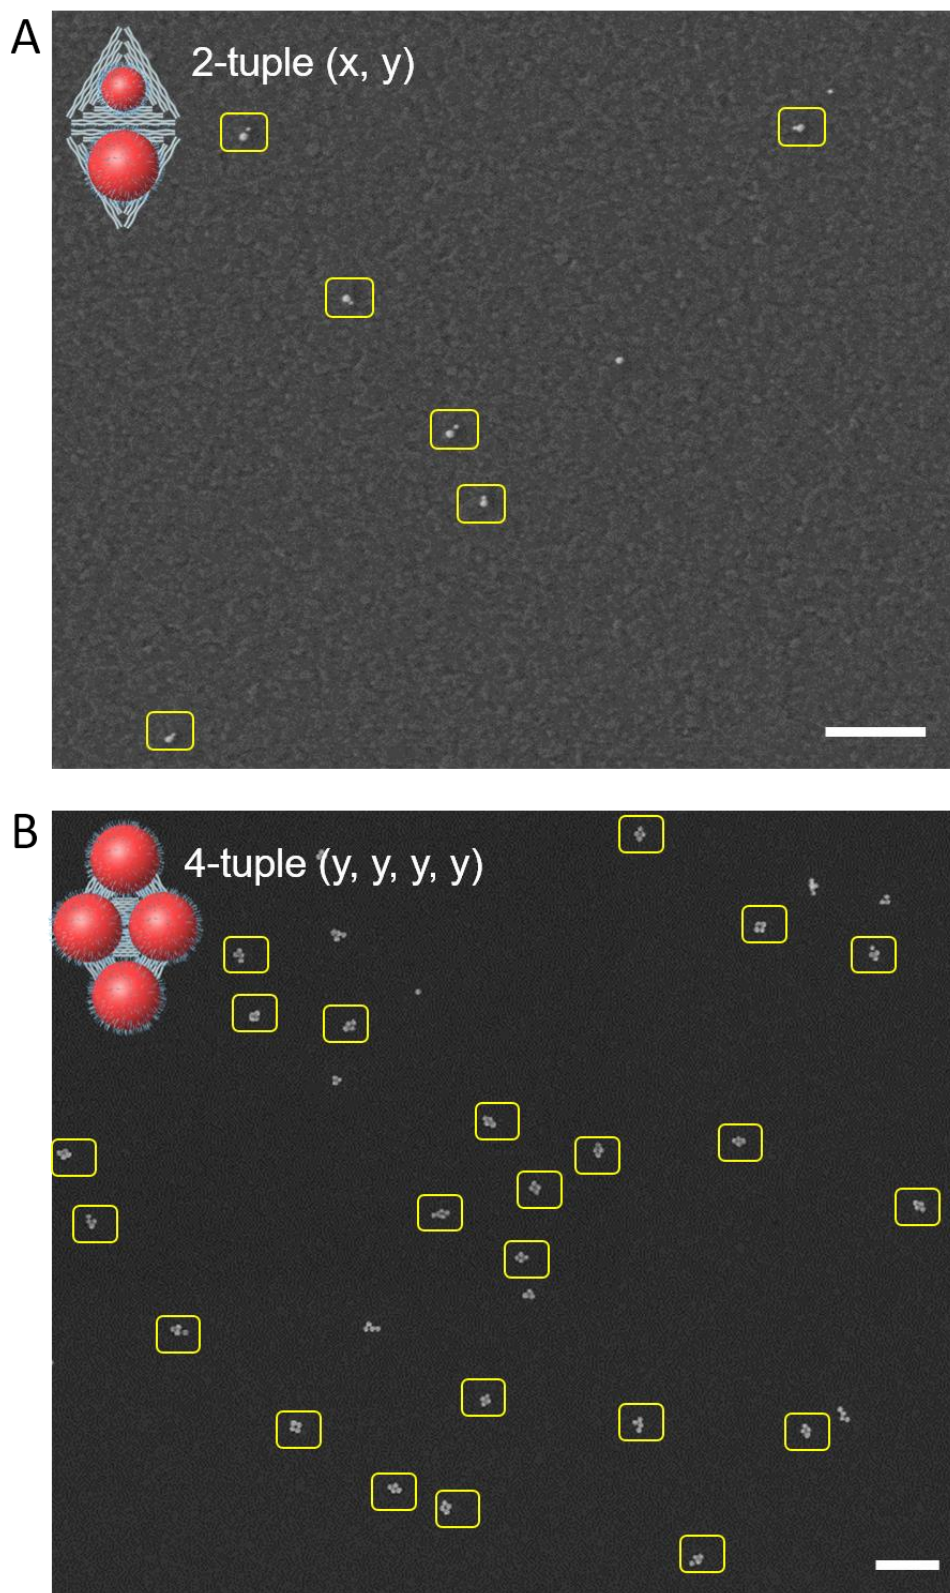

**Fig. S4. SEM images of 50-80 nm and 80-80-80-80 nm AuNP metamolecules. (A)** SEM image of the 2-tuple (x, y). **(B)** SEM image of the 4-tuple (y, y, y, y). Scale bars, 1  $\mu\text{m}$ .

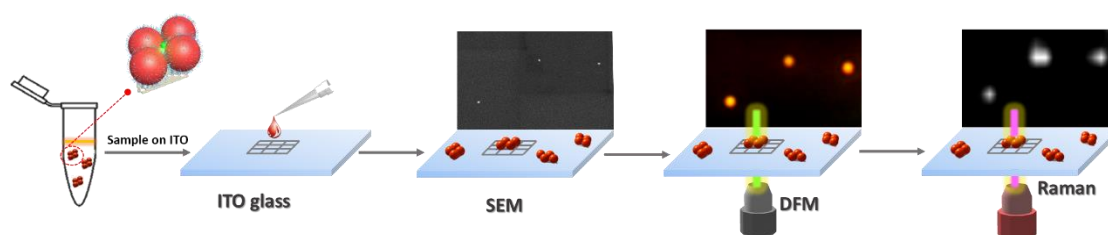

**Fig. S5. Schematic representation of SEM-DFM-Raman correlative imaging for plasmonic property investigations.** In a typical procedure, a diluted solution of a metamolecule sample was deposited on the ITO glass and characterized with co-localized SEM, DFM and Raman, respectively.

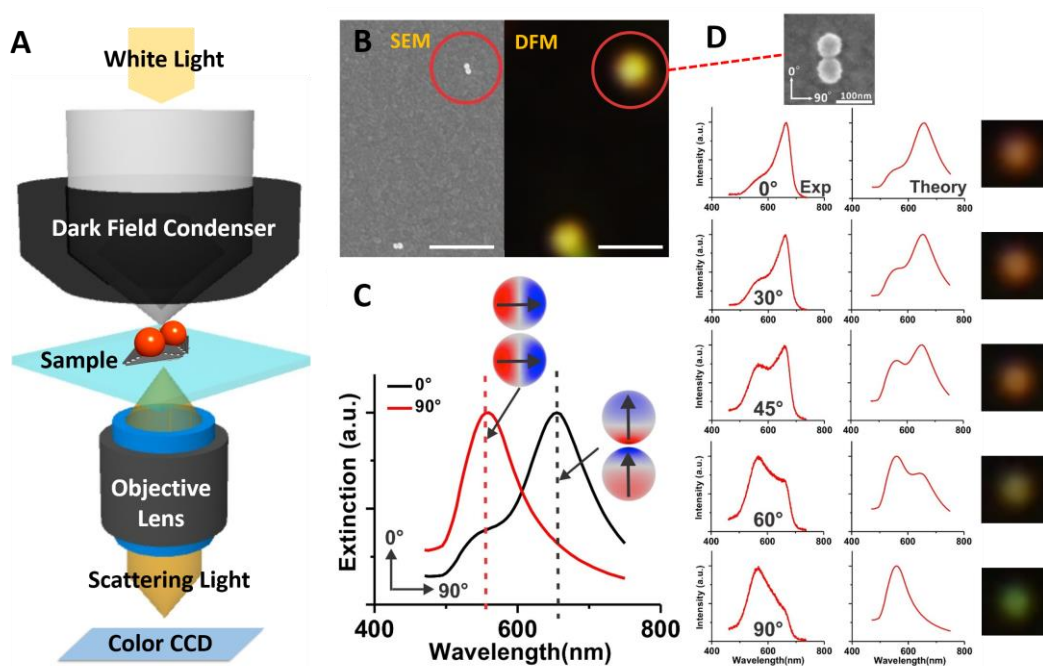

**Fig. S6. Characterization of the plasmonic properties of 80-nm homodimer [tuple (y, y)] using the “DFM-SEM correlative imaging.”** (A) Experimental DFM setup. (B) SEM image and DFM image at the same position of an 80 nm AuNP dimer. Scale bars, 1  $\mu\text{m}$ . (C) The theoretic extinction spectra and surface charge distribution plot of the 80 nm dimer when the polarization angles of the incident light are 0 and 90° respectively. (D) SEM image and scattering spectra (the experimental and theoretic) of the 80 nm dimer in the red circle in (B) at different polarization angles of incident light. The orientation angles of the incident light relative to the cluster are shown in the SEM image. The scattering spectra were integrated as 20 seconds.

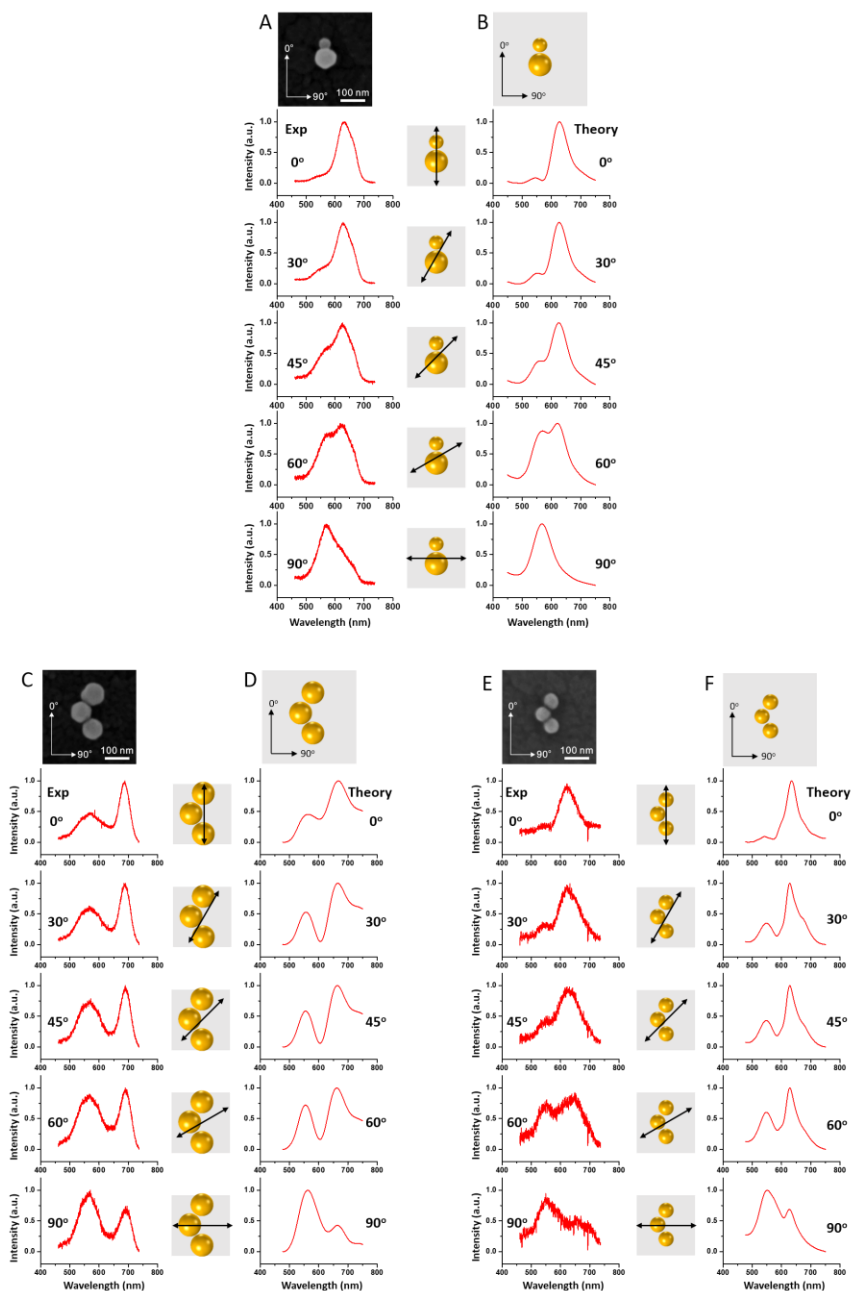

**Fig. S7. Characterization of the plasmonic properties of three metamolecules using the “DFM-SEM correlative imaging.”** (A, B) Experimental and theoretic scattering spectra of a hetero-trimer [2-tuple (x, y)] at different polarization angles of incident light. The orientation angles of the incident light relative to the cluster are shown in the middle column. The scattering spectra were integrated as 20 seconds. (C, D) Experimental and theoretic scattering spectra of homo-trimer [3-tuple (y, y, y)] at different polarization angles of incident light. The orientation angles of the incident light relative to the cluster are shown in the middle column. The scattering spectra were integrated as 20 seconds. (E, F) Experimental and theoretic scattering spectra of homo-trimer [3-tuple (x, x, x)] at different polarization angles of incident light. The orientation angles of the incident light relative to the cluster are shown in the middle column. The scattering spectra were integrated as 30 seconds.

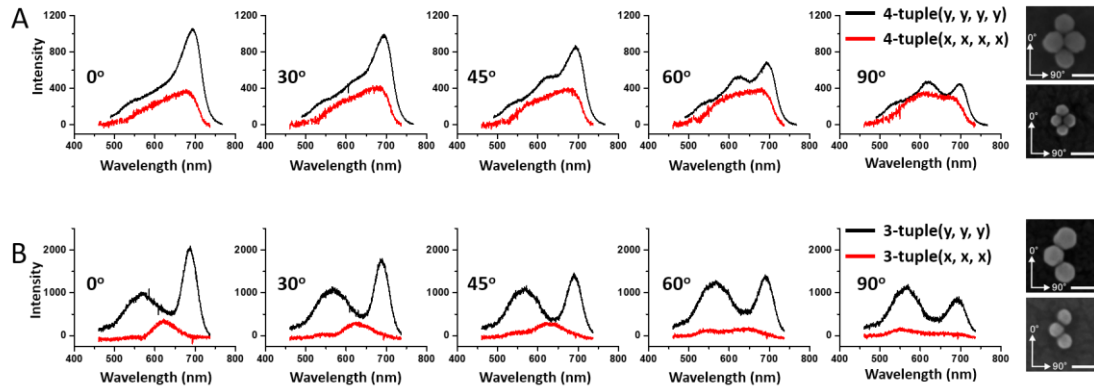

**Fig. S8. The absolute scattering spectra of two homotetramers and two homotrimers.** (A) Experimental scattering spectra at different polarization angles of incident light and SEM images of two homo-tetramers [4-tuple (x, x, x, x) and 4-tuple (y, y, y, y)]. The scattering spectra were integrated as 10 seconds for 4-tuple (y, y, y, y) and 30 seconds for 4-tuple (x, x, x, x), respectively. (B) Experimental scattering spectra at different polarization angles of incident light and SEM images of two homo-trimers [tuple (x, x, x) and tuple (y, y, y)]. The scattering spectra were integrated as 20 seconds for 3-tuple (y, y, y) and 30 seconds for 3-tuple (x, x, x), respectively. Scale bars, 100 nm.

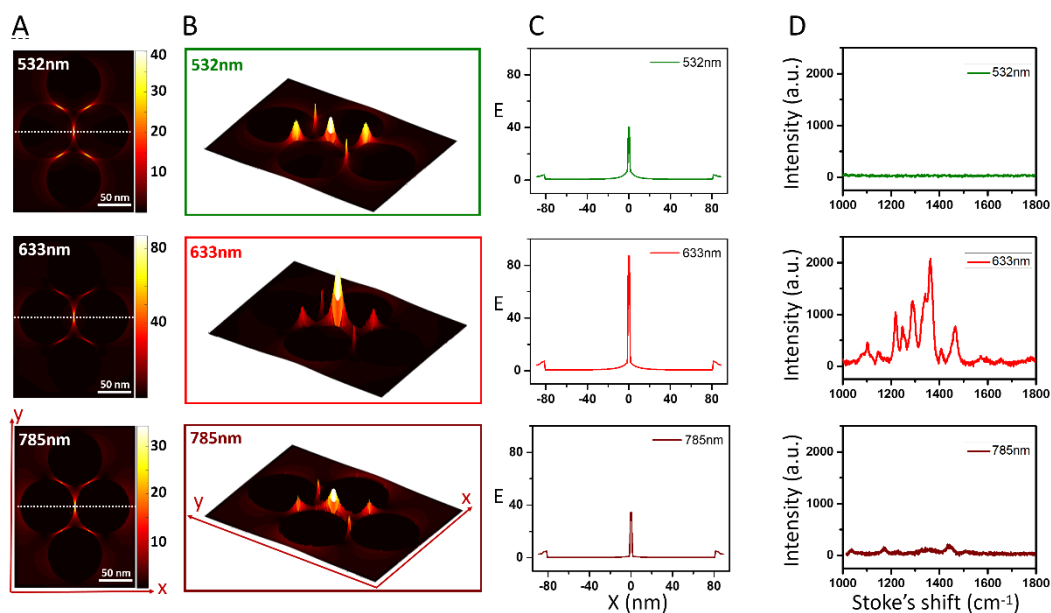

**Fig. S9. FDTD calculations of the electromagnetic field (E) at mid-height of the tetrameric metamolecules.** (A) FDTD calculated E enhancement at a wavelength of 532-nm, 633-nm and 785-nm. (B) 3D surface plot of the peak intensity variation across the tetrameric metamolecule at a wavelength of 532-nm, 633-nm and 785-nm. (C) The line electromagnetic field distribution profile along the center-horizontal line at an incident wavelength of 532-nm, 633-nm and 785-nm. (D) SERS spectra of three different incident wavelengths (green line, 532-nm; red line, 633-nm; wine red line, 785-nm) for three different SYBR Green I-modified tetrameric metamolecules in air. The incident light was polarized along the tetrameric metamolecule short axis (x-direction). The strongest enhancement was observed in the central gap region at 633-nm, and the calculated EF values of Raman enhancement was  $5.7 \times 10^7$ . All spectra were taken with a 633-nm excitation laser, 10-s exposure for a single spectrum.

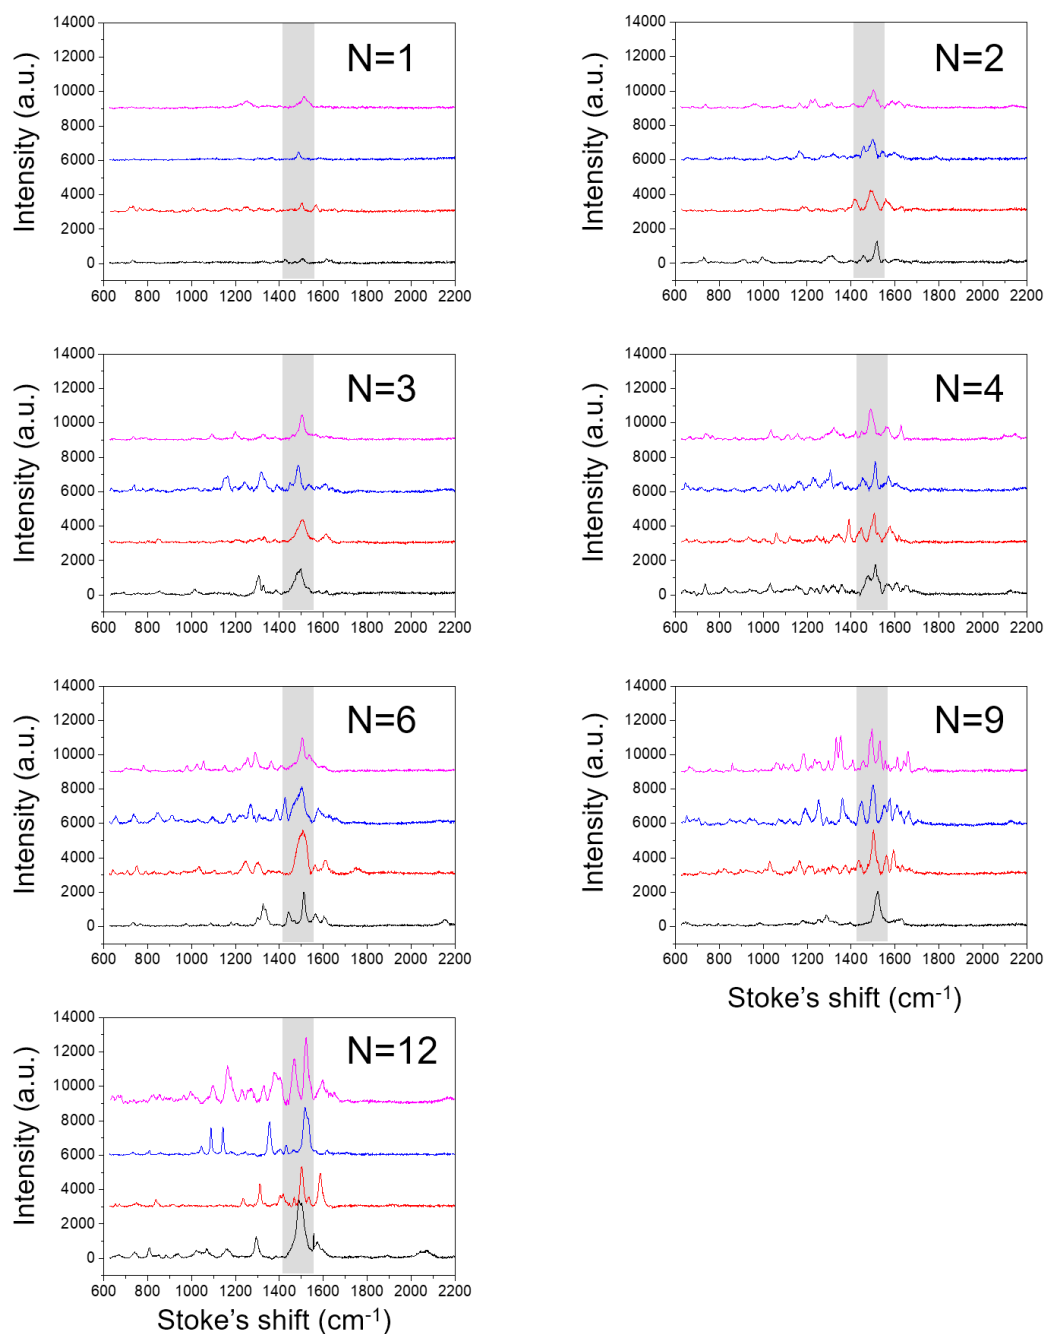

**Fig. S10. SERS spectra taken from individual tetrameric metamolecules with different numbers of ROX.** The corresponding Raman signal of ROX dye was obtained at a mapping step of  $1.5\ \mu\text{m} \times 1.5\ \mu\text{m}$ . All spectra were taken with a 633-nm excitation laser, 10-s exposure for a single spectrum.

## Supplementary Appendix

### Sequences of staple strands containing sticky ends

There are totally 20 staple strands are modified with sticky ends to organize two triangular origami into a rhombus-shaped super-origami. Sequence of the staple strands of the triangular A (the side A of one triangular origami was modified) and triangular C (the side C of the other triangular origami was modified) (left to right: 5'-3'):

A64h, ACGACAATAAATCCCGACTTGCGGGAGATCCTGAATCTTACCAGCCACCGA  
A59h, CAAAATAATAGAAGGCTTATCCGGTTATCAAC  
A56h, ACAAGAAAGCAAGCAAATCAGATAACAGCCATATTATTTATTAAAGGG  
A45h, AAATGAAAAGCAAGCCGTTTTTATGAAACCAA  
A41h, TTTCCTTAGCACTCATCGAGAACAATAGCAGCCTTTACAGTTGACGAG  
A08h, AATTAACTCGGAATAAGTTTATTTCCAGCGCC  
A12h, CATTCAACAAACGCAAAGACACCAGAACACCCTGAACAAATAGAGCTT  
A23h, ACAAGAATGTTAGCAAACGTAGAAAATTATTC  
A26h, CACCGTCACCTTATTACGCAGTATTGAGTTAAGCCCAATACAAGTTTT  
A31h, CGAAGCCCAAACGCAATAATAACGAAAATCACCAG  
C31h, GTAAAAGAACATCACTTGCCTGAGCGCCATTAAAA  
C26h, CTATTAGTATATCCAGAACAATATCAGGAACGGTACGCCAGCCAGTTA  
C23h, ATTTTAGATACCGCCAGCCATTGCGGCACAGA  
C12h, AGAGATAGTTTGACGCTCAATCGTACGTGCTTTCCTCGTTAACGTCAA  
C08h, CACGTATACTGAAATGGATTATTTAATAAAAAG  
C41h, TTTCACCAGCCTGGCCCTGAGAGAAAGCCGGCGAACGTGGGACGGGAG  
C45h, GACGGGGAGTTGCAGCAAGCGGTCATTGGGCG  
C56h, TTAATGAAGTTTGATGGTGGTTCCGAGGTGCCGTAAAGCAGATAACCC  
C59h, TTGGGGTCGAAATCGGCAAAATCCGGGAAACC  
C64h, AACTCACATTATTGAGTGTGTTCCAGAAACCGTCTATCAGGGTATCTTAC

There are totally 38 staple strands are modified with sticky ends to organize three triangular origami into a trapezoid-shaped super-origami. The three triangle origami are named as **Left** (the side A of triangular origami was modified), **Middle** (the side C and the side A of triangular origami were modified) and **Right** (the side C of triangular origami was modified). The sequence of modified staple strands to link **Left** (the side A) and **Middle** (the side C) are the same as the sequence of the rhombus-shaped super-origami. Sequence of the staple strands to link the **Middle** (the side A) and **Right** (the side C) are as follows (left to right: 5'-3'):

A63h, GAGCGTCTGGCGTTTTAGCGAACCCAACATGT  
A61h, GCGCCTGTTATTCTAAGAACGCGATTCCAGAGCCTAATTTGAATCCTG  
A53h, CAAATAAGATTACCGCGCCCAATAAATAATAT

A49h, AGCATGTATTTTCATCGTAGGAATCAAACGATTTTTTGTTTAGAATCAG  
 A37h, ACATAAAACAGGGAAGCGCATT  
 A16h, GTAATTGATGGCAACATATAAAAGCGATTGAG  
 A20h, TTGACGGAAATACATACATAAAGGGCGCTAATATCAGAGACTAAATCG  
 A28h, AAGAAACATGGCATGATTAAGACTCCGACTTG  
 A30h, TATCTTACCGAAGCCCAAACGCAATAATAACGAAAATCACCAGCGATGGCC  
 C30h, TAAAACATTAGAAGAAGCTCAAACCTTTTTATAATCAGTGAGACGCTAAC  
 C28h, AGAAGTGTATCGGCCTTGCTGGTACTTTAATG  
 C20h, GAATACGTAACAGGAAAAACGCTCCTAAACAGGAGGCCGATCCCAATC  
 C16h, AGCGGGAGATGGAAATACCTACATAACCCCTC  
 C37h, CGAGAAAGGAAGGGAAGCGTACTATGGTTGCTAGAGAATA  
 C49h, GTTTGCCTCACGCTGGTTTGCCCCAAGGGAGCCCCCGATTGTCAGAGG  
 C53h, GAACCCTAAGCAGGCGAAAATCCTTCGGCCAA  
 C61h, TTCCAGTCCTTATAAATCAAAAGAGAACCATCACCCAAATATAAGAGC  
 C63h, CACTACGTATAGCCCGAGATAGGGATTGCGTT

There are two groups of “anchoring strands” that are modified with sticky ends to organize 2-tuple metamolecules and 3-tuple metamolecules (Group 1 and Group 2). Each group contains 18 “anchoring strands” on the inner of the rhombus- ( $R_I$ ) and trapezoid-shaped ( $T_I$ ) super-origami.

For dimer (x, x), triangular A: group 1; triangular C: group 1

For dimer (x, y), triangular A: group 1; triangular C: group 2

For dimer (y, x), triangular A: group 2; triangular C: group 1

For dimer (y, y), triangular A: group 2; triangular C: group 2

For trimer (x, x, x), Left: group 1; Middle: group 1; Right: group 1

For trimer (x, y, x), Left: group 1; Middle: group 2; Right: group 1

For trimer (x, x, y), Left: group 1; Middle: group 1; Right: group 2

For trimer (y, x, x), Left: group 2; Middle: group 1; Right: group 1

For trimer (x, y, y), Left: group 1; Middle: group 2; Right: group 2

For trimer (y, x, y), Left: group 2; Middle: group 1; Right: group 2

For trimer (y, y, x), Left: group 2; Middle: group 2; Right: group 1

For trimer (y, y, y), Left: group 2; Middle: group 2; Right: group 2

Sequence of the staple strands (left to right: 5'-3'):

Group 1:

A01-a, AGACTCTAATGCAGTCACCAACGCTTTT

CGGGGTTTCCTCAAGAGAAGGATTTTGAATTA

A09-a, AGACTCTAATGCAGTCACCAACGCTTTT

GATAAGTGCCGTCGAGCTGAAACATGAAAGTATACAGGAG

A17-a, AGACTCTAATGCAGTCACCAACGCTTTT

AGCCCGGAATAGGTGAATGCCCCCTGCCTATGGTCAGTG

A33-a, AGACTCTAATGCAGTCACCAACGCTTTT

CCTTTTTTTCATTTAACAATTTTCATAGGATTAG

A38-a, AGACTCTAATGCAGTCACCAACGCTTTT

AAAACAAAATTAATTAAATGGAAACAGTACATTAGTGAAT  
 A46-a, AGACTCTAATGCAGTCACCAACGCTTTT  
 GAGCAAAAGAAGATGAGTGAATAACCTTGCTTATAGCTTA  
 B01-a, AGACTCTAATGCAGTCACCAACGCTTTT  
 CATATGTGTAATCGTAAAACTAGTCATTTTC  
 B09-a, AGACTCTAATGCAGTCACCAACGCTTTT  
 AGAAAAGCCCCAAAAAGAGTCTGGAGCAAACAATCACCAT  
 B17-a, AGACTCTAATGCAGTCACCAACGCTTTT  
 GCAAATATTTAAATTGAGATCTACAAAGGCTACTGATAAA  
 B33-a, AGACTCTAATGCAGTCACCAACGCTTTT  
 AGGGATAGCTCAGAGCCACCACCCCATGTCAA  
 B38-a, AGACTCTAATGCAGTCACCAACGCTTTT  
 CCTCAGAACCGCCACCCAAGCCCAATAGGAACGTAAATGA  
 B46-a, AGACTCTAATGCAGTCACCAACGCTTTT  
 AGGTTTAGTACCGCCATGAGTTTCGTCACCAGGATCTAAA  
 C01-a, AGACTCTAATGCAGTCACCAACGCTTTT  
 TCGGGAGATATACAGTAACAGTACAAATAATT  
 C09-a, AGACTCTAATGCAGTCACCAACGCTTTT  
 CCTGATTGCTTTGAATTGCGTAGATTTTCAGGCATCAATA  
 C17-a, AGACTCTAATGCAGTCACCAACGCTTTT  
 GCGCAGAGGCGAATTAATTATTTGCACGTAAATTCTGAAT  
 C33-a, AGACTCTAATGCAGTCACCAACGCTTTT  
 CGCGTCTGATAGGAACGCCATCAACTTTTACA  
 C38-a, AGACTCTAATGCAGTCACCAACGCTTTT  
 GCTCATTTTTTAACCAGCCTTCCTGTAGCCAGGCATCTGC  
 C46-a, AGACTCTAATGCAGTCACCAACGCTTTT  
 GTTAAAATTTCGCATTAATGTGAGCGAGTAACACACGTTGG

Group 2:

A01-b, AATAATAATAATAATAATAAT TTTT  
 CGGGGTTTCCTCAAGAGAAGGATTTTGAATTA  
 A09-b, AATAATAATAATAATAATAAT TTTT  
 GATAAGTGCCGTCGAGCTGAAACATGAAAGTATACAGGAG  
 A17-b, AATAATAATAATAATAATAAT TTTT  
 AGCCCGGAATAGGTGAATGCCCCCTGCCTATGGTCAGTG  
 A33-b, AATAATAATAATAATAATAAT TTTT  
 CCTTTTTTCATTTAACAATTCATAGGATTAG  
 A38-b, AATAATAATAATAATAATAAT TTTT  
 AAAACAAAATTAATTAAATGGAAACAGTACATTAGTGAAT  
 A46-b, AATAATAATAATAATAATAAT TTTT  
 GAGCAAAAGAAGATGAGTGAATAACCTTGCTTATAGCTTA  
 B01-b, AATAATAATAATAATAATAAT TTTT  
 CATATGTGTAATCGTAAAACTAGTCATTTTC  
 B09-b, AATAATAATAATAATAATAAT TTTT

AGAAAAGCCCCAAAAAGAGTCTGGAGCAAACAATCACCAT  
 B17-b, AATAATAATAATAATAATAAT TTTT  
 GCAAATATTTAAATTGAGATCTACAAAGGCTACTGATAAA  
 B33-b, AATAATAATAATAATAATAAT TTTT  
 AGGGATAGCTCAGAGCCACCACCCCATGTCAA  
 B38-b, AATAATAATAATAATAATAAT TTTT  
 CCTCAGAACCGCCACCCAAGCCCAATAGGAACGTAAATGA  
 B46-b, AATAATAATAATAATAATAAT TTTT  
 AGGTTTAGTACCGCCATGAGTTTCGTCACCAGGATCTAAA  
 C01-b, AATAATAATAATAATAATAAT TTTT  
 TCGGGAGATATACAGTAACAGTACAAATAATT  
 C09-b, AATAATAATAATAATAATAAT TTTT  
 CCTGATTGCTTTGAATTGCGTAGATTTTCAGGCATCAATA  
 C17-b, AATAATAATAATAATAATAAT TTTT  
 GCGCAGAGGCGAATTAATTATTTGCACGTAAATTCTGAAT  
 C33-b, AATAATAATAATAATAATAAT TTTT  
 CGCGTCTGATAGGAACGCCATCAACTTTTACA  
 C38-b, AATAATAATAATAATAATAAT TTTT  
 GCTCATTTTTTAACCAGCCTTCCTGTAGCCAGGCATCTGC  
 C46-b, AATAATAATAATAATAATAAT TTTT  
 GTTAAAATTTCGCATTAATGTGAGCGAGTAACACACGTTGG

The four corners of a rhombus-shaped super-origami ( $R_O$ ) are modified with sticky ends to organize 4-tuple metamolecules. Each corner contains 12 “anchoring strands”. The following staples are modified on each corner (clockwise).

Corner 1: B14, B21, B22, B24, B27, B29 (triangular A)  
 C50, C51, C52, C57, C58, C62 (triangular A)

Corner 2: A14, A21, A22, A24, A27, A29 (triangular A)  
 C50, C51, C52, C57, C58, C62 (triangular C)

Corner 3: B50, B51, B52, B57, B58, B62 (triangular C)  
 A14, A21, A22, A24, A27, A29 (triangular C)

Corner 4: A50, A51, A52, A57, A58, A62 (triangular A)  
 C14, C21, C22, C24, C27, C29 (triangular C)

There are two kinds of modifications of these staples.

**Modification 1:** the staples were extended with a sequence of AGACTCTAATGCAGTCACCAACGCTTTT on the 5';

**Modification 2:** the staples were extended with a sequence of AATAATAATAATAATAATAATTTTT on the 5'

For 4-tuple metamolecules, the specific sequences are as follows:

| 4-tuple      | Corner 1       | Corner 2       | Corner 3       | Corner 4       |
|--------------|----------------|----------------|----------------|----------------|
| (x, x, x, x) | Modification 1 | Modification 1 | Modification 1 | Modification 1 |
| (y, x, x, x) | Modification 2 | Modification 1 | Modification 1 | Modification 1 |
| (x, y, x, x) | Modification 1 | Modification 2 | Modification 1 | Modification 1 |
| (x, x, y, x) | Modification 1 | Modification 1 | Modification 2 | Modification 1 |
| (x, x, x, y) | Modification 1 | Modification 1 | Modification 1 | Modification 2 |
| (x, x, y, y) | Modification 1 | Modification 1 | Modification 2 | Modification 2 |
| (x, y, x, y) | Modification 1 | Modification 2 | Modification 1 | Modification 2 |
| (x, y, y, x) | Modification 1 | Modification 2 | Modification 2 | Modification 1 |
| (y, y, x, x) | Modification 2 | Modification 2 | Modification 1 | Modification 1 |
| (y, x, y, x) | Modification 2 | Modification 1 | Modification 2 | Modification 1 |
| (y, x, x, y) | Modification 2 | Modification 1 | Modification 1 | Modification 2 |
| (x, y, y, y) | Modification 1 | Modification 2 | Modification 2 | Modification 2 |
| (y, x, y, y) | Modification 2 | Modification 1 | Modification 2 | Modification 2 |
| (y, y, x, y) | Modification 2 | Modification 2 | Modification 1 | Modification 2 |
| (y, y, y, x) | Modification 2 | Modification 2 | Modification 2 | Modification 1 |
| (y, y, y, y) | Modification 2 | Modification 2 | Modification 2 | Modification 2 |

There are totally 6 staple strands are modified with sticky ends to capture ROX-DNA. The staple sequences were broken to ensure ROX and AuNPs are on the same side. The sequence (S3-A-37m) was used to do the single molecular SERS experiment. Sequence of the staple strands (left to right: 5'-3'):

Triangular A:

**S3-A-35m,**

CGTTGGGGGCACTATTTCAAGCCACGATCGTTTTTATACAAAGCCATCTT

**A-35n,** AGTATAAAATATGCGT

**S3-A-36m,**

CGTTGGGGGCACTATTTCAAGCCACGATCGTTTTAGAACGGGAAATTCAT

**A-36n,** CAAGTACCTCATTCCA

**S3-A-37m**,  
CGTTGGGGGCACTATTTCAAGCCACGATCGTTTTAGAGAATAACATAAAAA  
CAGGGAA  
**A-37n**, AGAGAATA

Triangular C:

**S3-C-35m**,  
CGTTGGGGGCACTATTTCAAGCCACGATCGTTTTTCATGCCTGGTCAGTTG  
**C-35n**, CTCTAGAGCAAGCTTG  
**S3-C-36m**,  
CGTTGGGGGCACTATTTCAAGCCACGATCGTTTTGGCAACAGCAGTCACA  
**C-36n**, CCTTCACCGTGAGACG  
**S3-C-37m**,  
CGTTGGGGGCACTATTTCAAGCCACGATCGTTTTGAAGGGAAGCGTACTAT  
GGTTGCT  
**C-37n**, CGAGAAAG

**Sequences of ROX modified strands.** The strand S1-ROX was modified with ROX on the 5', the strand S5-ROX was modified with ROX on the 3', the other two strands were used to construct the 120bp long double helix structure.

**S1-ROX**, ROX-TTTTCGGGTTGATCCGTCAACACGCCGCGC  
**S5-ROX**,  
CGTTGCGTGTTCTCATAAATTAAGAACACGCGGCGCGGCGTGTTGACGGAT  
CAACCCG-ROX  
**S1**, TTTTCGGGTTGATCCGTCAACACGCCGCGC  
**S2**, CGCGTGTTCTTAATTTATGAGAACACGCAACGGCGCGCCGGGACGAT  
GAACGCGGCGCCG  
**S4**, CGATCGTGGCTTGAAATAGTGCCCCAACGCGGCGCCGCGTTCATCG  
TCCCGGCGCGC  
**S5**, CGTTGCGTGTTCTCATAAATTAAGAACACGCGGCGCGGCGTGTTGAC  
GGATCAACCCG

**Sequences of thiolated strands that covered the AuNPs.** The thiolated strands are modified with monothiol on the 3'.

Corner, ATTATTATTATTATTATTATTATTTTTT-SH  
S5b, GCGTTGGTGACTGCATTAGAGTCTTTTT-SH
